# Supplementary material for: Chlorocobaloxime containing N-(4-pyridylmethyl)-1,8-naphthalamide peripheral ligands: synthesis, characterization and enhanced electrochemical hydrogen evolution in alkaline medium
Source: Royal Society of Chemistry journal article supplement (doi:10.1039/d2dt02511f), 2022-12-15
Supplement: d2dt02511f1.pdf [file d2dt02511f1.pdf]

## Electronic Supplementary Information

### **Chlorocobaloxime Containing N-(4-pyridylmethyl)-1,8-naphthalamide Peripheral Ligands: Synthesis, Characterization and Enhanced Electrochemical Hydrogen Evolution in Alkaline Medium**

Jitendra Kumar Yadav,<sup>a</sup> Baghendra Singh,<sup>b</sup> Sarvesh Kumar Pal,<sup>a</sup> Nanhai Singh,<sup>a</sup> Prem Lama,<sup>c\*</sup> Arindam Indra<sup>b\*</sup> and Kamlesh Kumar<sup>a\*</sup>

<sup>a</sup>Department of Chemistry, Institute of Science, Banaras Hindu University, Varanasi 221005, India.

<sup>b</sup>Department of Chemistry, Indian Institute of Technology (BHU), Varanasi, UP-221005, India.

<sup>c</sup>CSIR Indian Institute of Petroleum, Tech Block, Mohkampur, Dehradun 248005, Uttarakhand, India.

\*Corresponding authors:

E-mail: *kamlesh.kumar@bhu.ac.in* (Kamlesh Kumar),

Email: *prem.lama@iip.res.in* (Prem Lama),

Email: *arindam.chy@iitbhu.ac.in* (Arindam Indra)

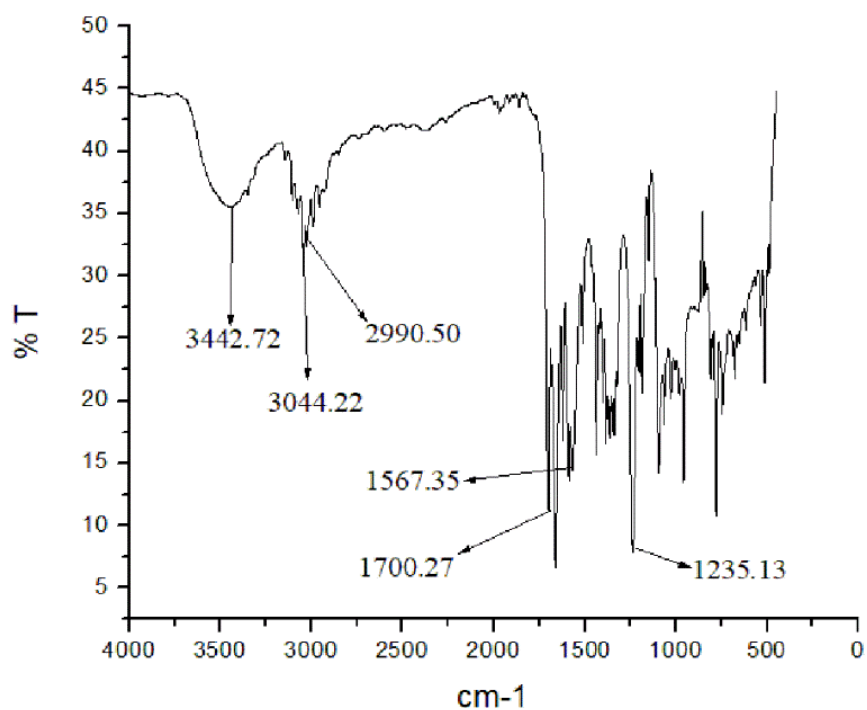

**Figure S1:** IR Spectrum of complex [ClCo(dmgh)<sub>2</sub>(L<sub>1</sub>)] (**1**)

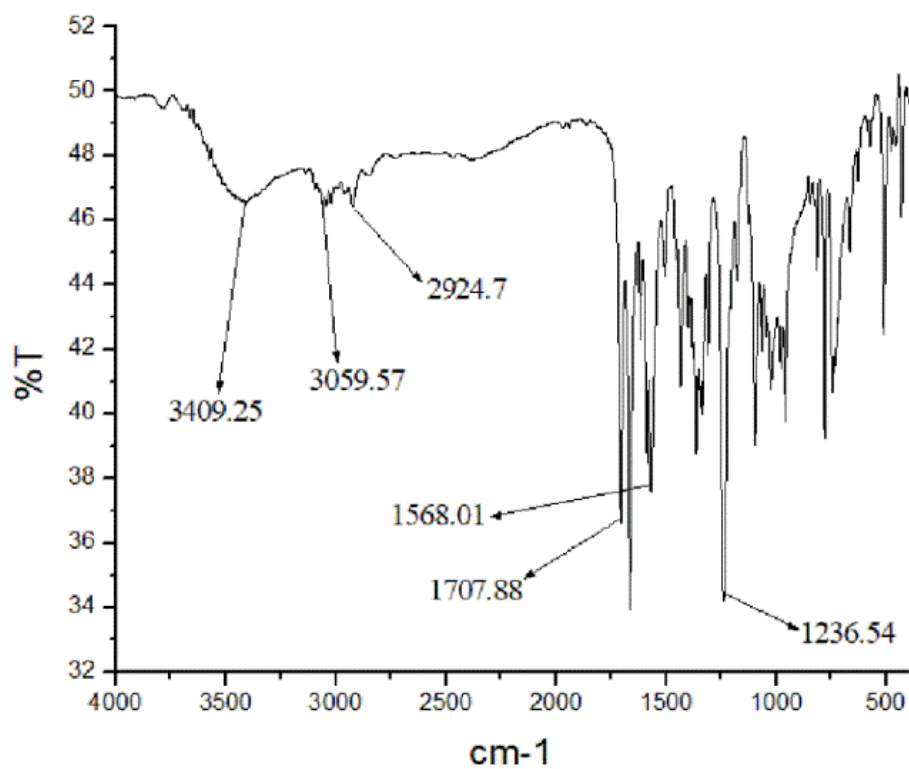

**Figure S2:** IR Spectrum of complex [ClCo(dmgh)<sub>2</sub>(L<sub>2</sub>)] (**2**)

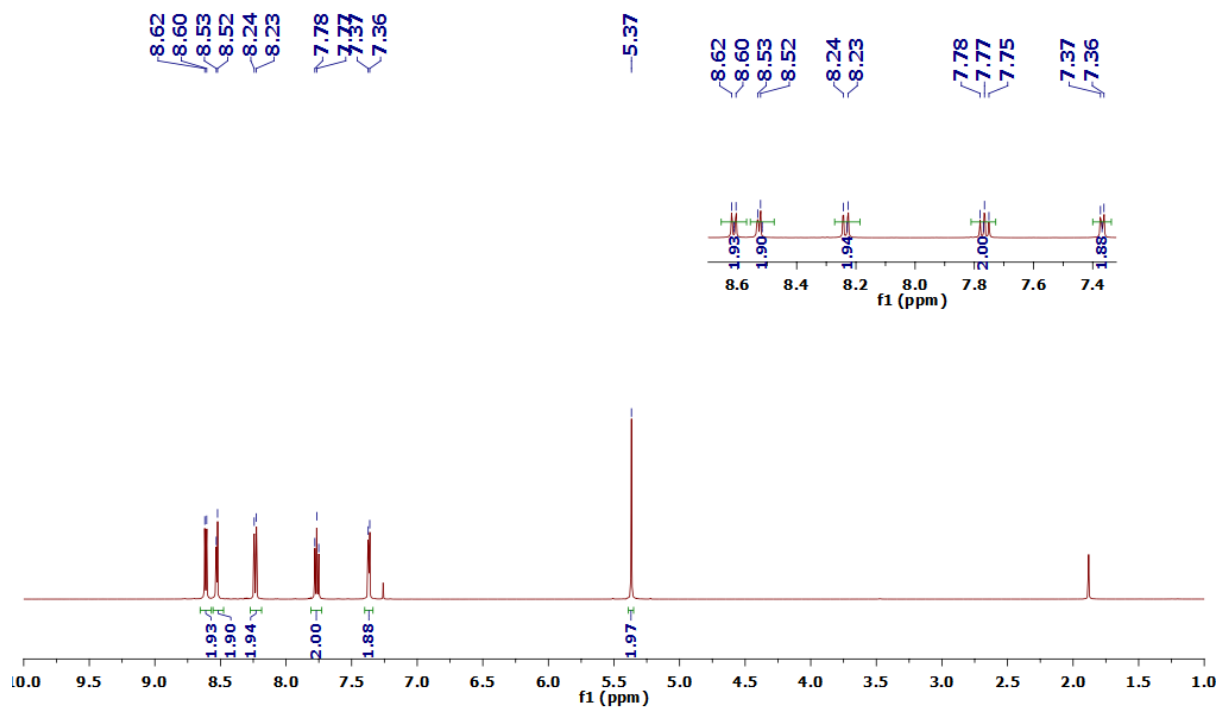

Figure S3:  $^1\text{H}$  NMR spectrum (500 MHz,  $\text{CDCl}_3$ ) of  $\text{L}_1$

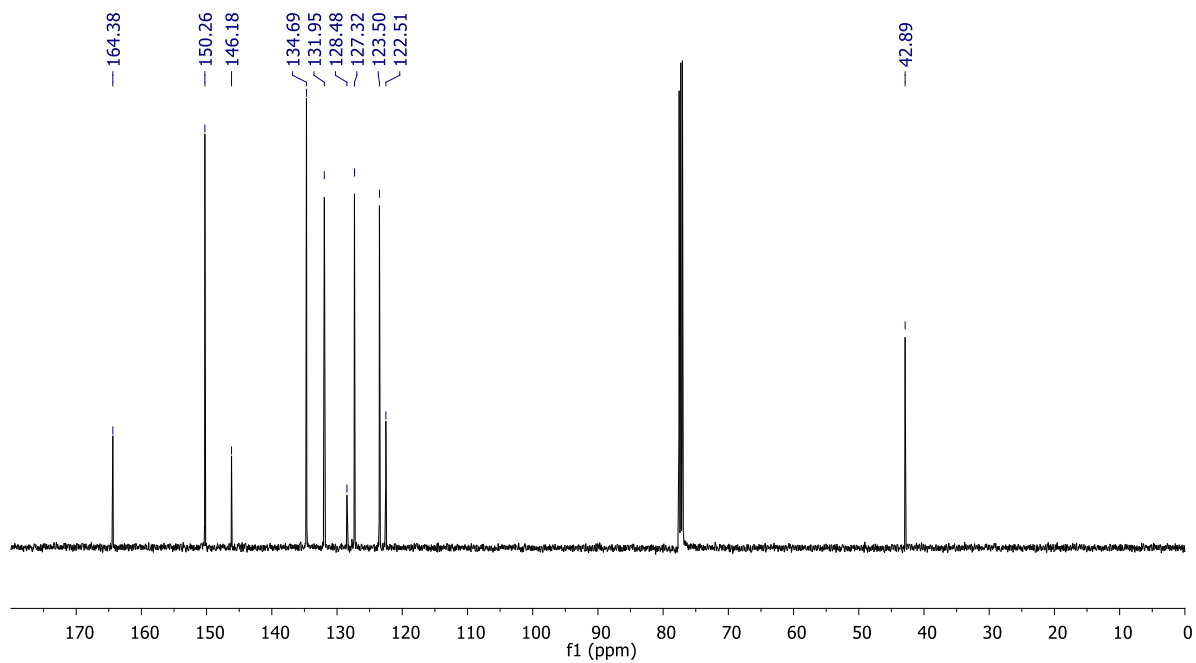

Figure S4:  $^{13}\text{C}\{^1\text{H}\}$  NMR spectrum (125 MHz,  $\text{CDCl}_3$ ) of  $\text{L}_1$

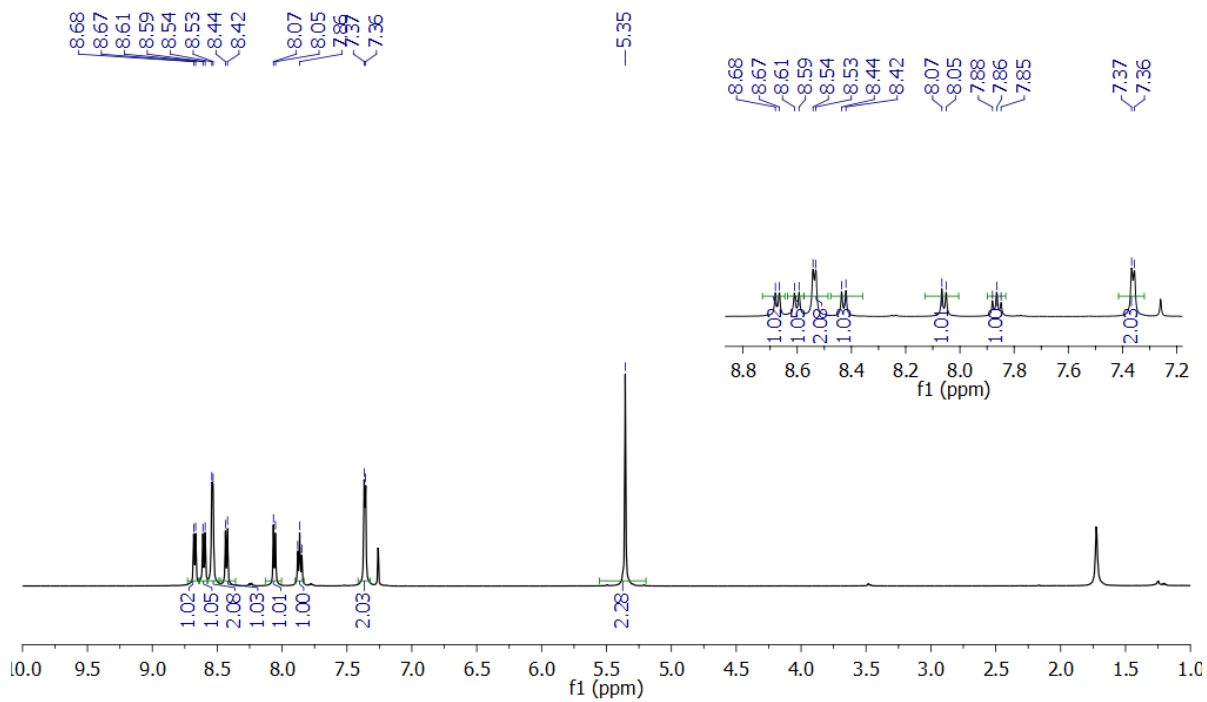

Figure S5:  $^1\text{H}$  NMR spectrum (500 MHz,  $\text{CDCl}_3$ ) of  $\text{L}_2$

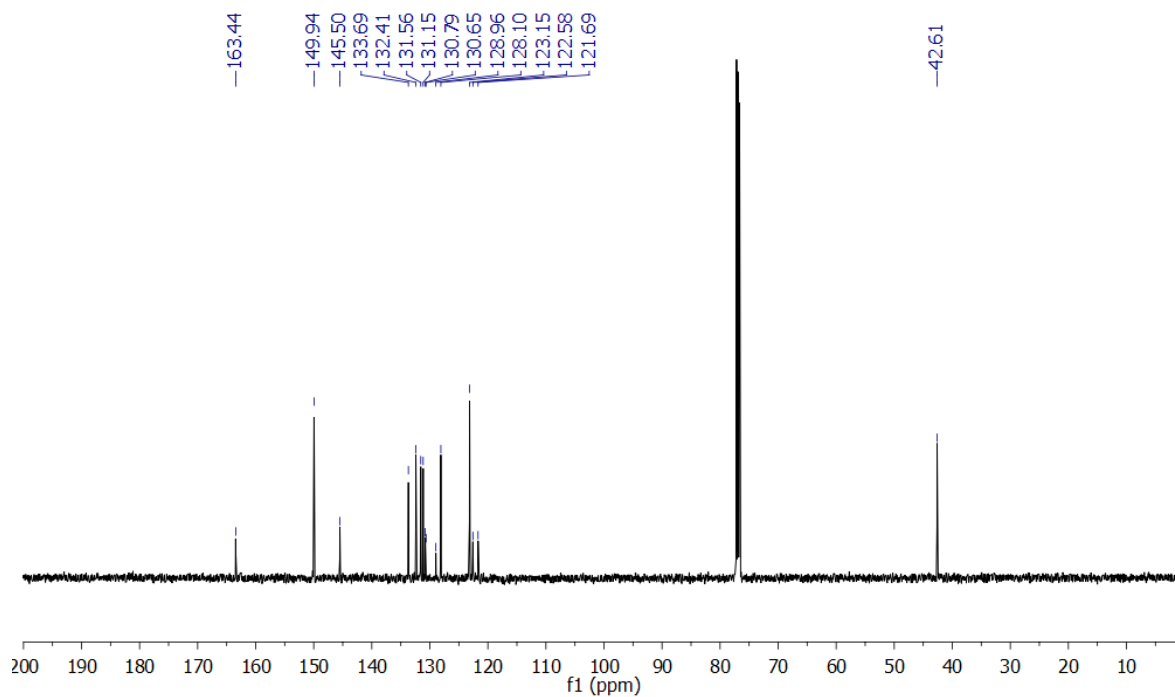

Figure S6:  $^{13}\text{C}\{^1\text{H}\}$  NMR spectrum (125 MHz,  $\text{CDCl}_3$ ) of  $\text{L}_2$

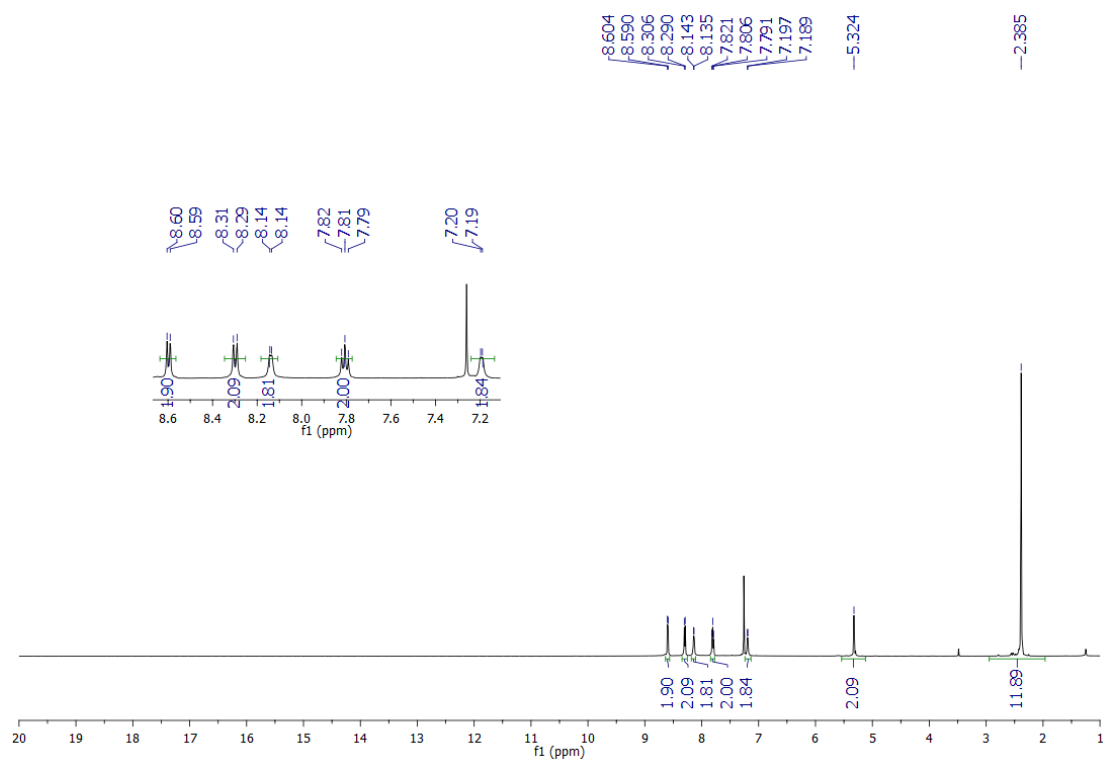

**Figure S7:**  $^1\text{H}$  NMR spectrum (500 MHz,  $\text{CDCl}_3$ ) of  $[\text{ClCo}(\text{dmgh})_2(\text{L}_1)]$  (**1**)

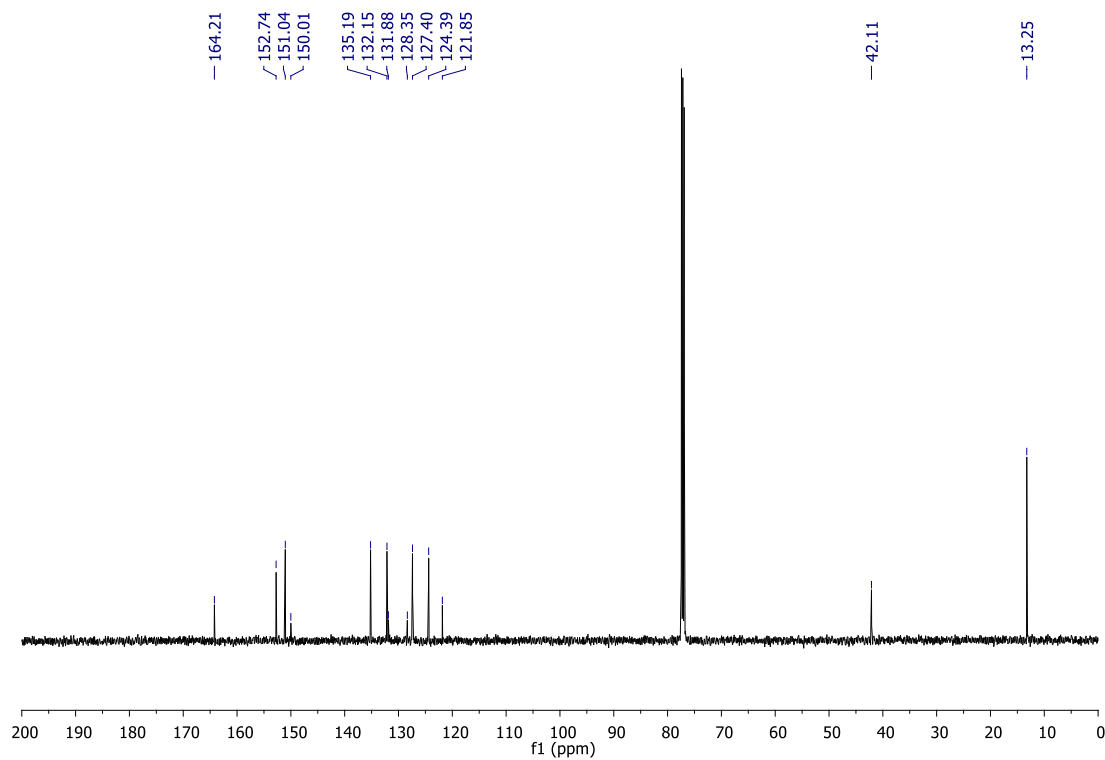

**Figure S8:**  $^{13}\text{C}\{^1\text{H}\}$  NMR spectrum (125 MHz,  $\text{CDCl}_3$ ) of  $[\text{ClCo}(\text{dmgh})_2(\text{L}_1)]$  (**1**)

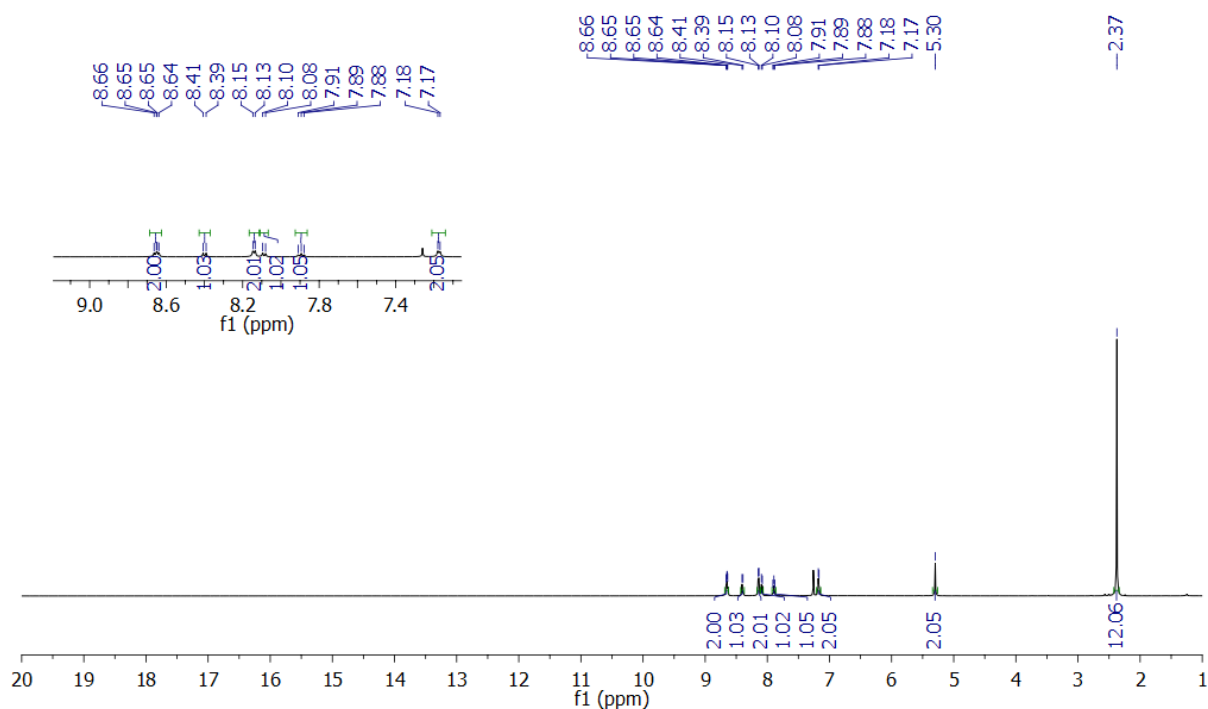

**Figure S9:**  $^1\text{H}$  NMR spectrum (500 MHz,  $\text{CDCl}_3$ ) of  $[\text{ClCo}(\text{dmgh})_2(\text{L}_2)]$  (**2**)

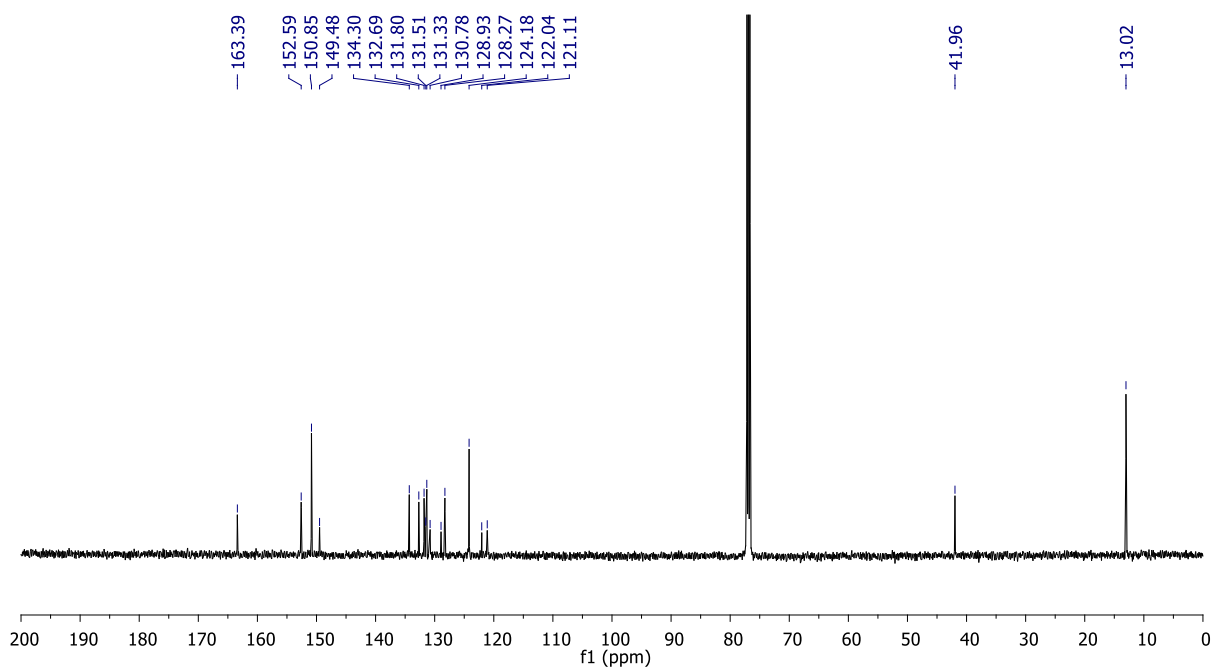

**Figure S10:**  $^{13}\text{C}\{^1\text{H}\}$  NMR spectrum (125 MHz,  $\text{CDCl}_3$ ) of  $[\text{ClCo}(\text{dmgh})_2(\text{L}_2)]$  (**2**)

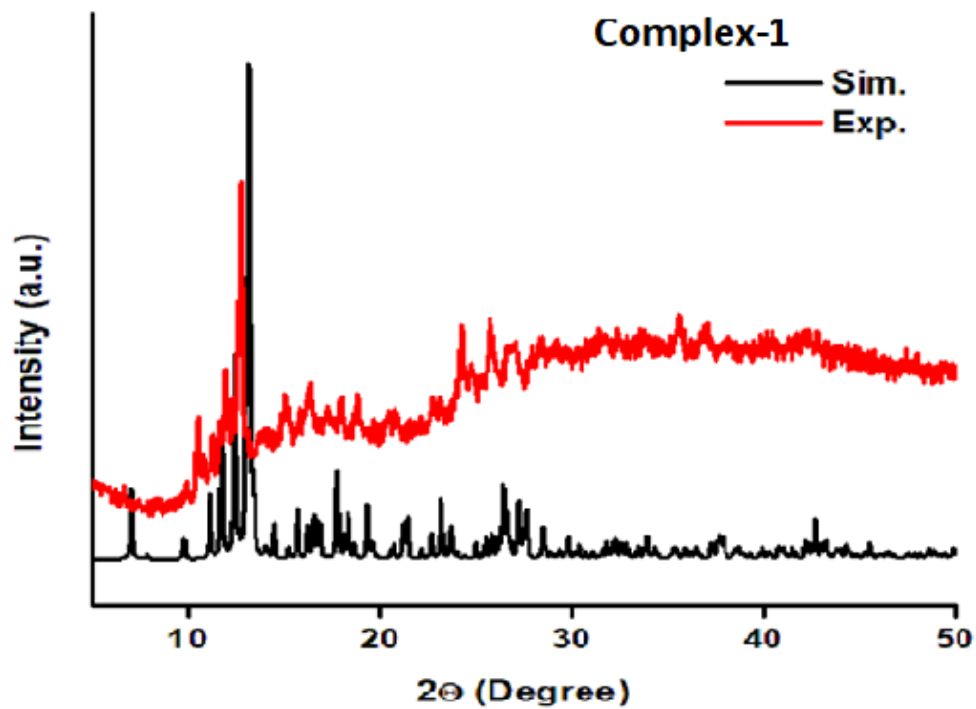

**Figure S11:** Simulated and experimental PXRD patterns of complex  $[\text{ClCo}(\text{dmgH})_2(\text{L}_1)]$  (1)

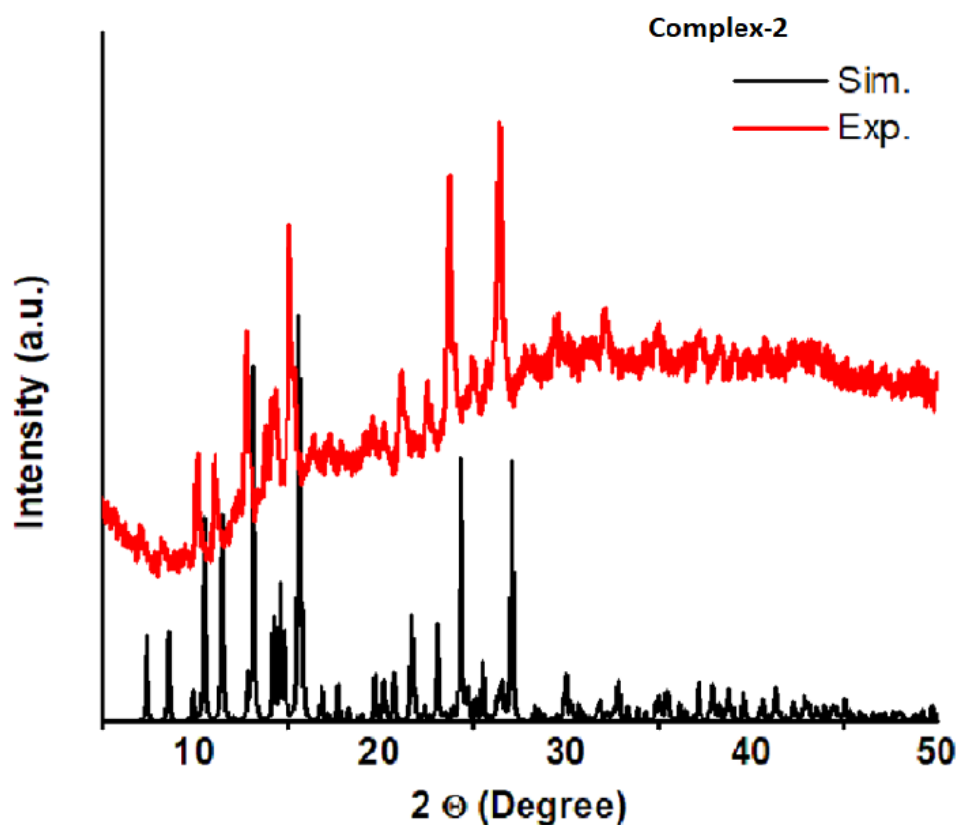

**Figure S12:** Simulated and experimental PXRD patterns of complex  $[\text{ClCo}(\text{dmgH})_2(\text{L}_2)]$  (2)

**Table S1:** Cobaloxime catalysed HER data. Overpotentials at a fixed current density ( $\text{mA cm}^{-2}$ ) are reported in mV.

| Sr. No. | Electrode    | Cobaloxime Catalyst | Overpotential (mV) | Current density ( $\text{mA cm}^{-2}$ ) | Electrolyte                             | Ref                                                               |
|---------|--------------|---------------------|--------------------|-----------------------------------------|-----------------------------------------|-------------------------------------------------------------------|
| 1       | CNT          | Co-a                | 590                | -1                                      | Acetate( pH 4.5)                        | <i>Nat. Chem.</i> <b>2013</b> , <i>5</i> , 48-53                  |
| 2       | CNT          | Co-b                | 100                | -2                                      | Phosphate( pH 6.5)                      | <i>Angew. Chem., Int. Ed.</i> <b>2016</b> , <i>55</i> , 3952-3957 |
| 3       | CNT          | Co-c                | 100                | -2                                      | Phosphate (pH 6.5)                      | <i>Angew. Chem., Int. Ed.</i> <b>2016</b> , <i>55</i> , 3952-3957 |
| 4       | Carbon cloth | Co-d                | 200                | -4                                      | acetate (pH 4.5)                        | <i>Chem. Commun.</i> <b>2015</b> , <i>51</i> , 11508-11511        |
| 5       | Carbon Cloth | 1                   | 435                | -10                                     | 0.5 M $\text{H}_2\text{SO}_4$ (pH 0.13) | This work                                                         |
| 6       | Carbon Cloth | 1                   | 420                | -1                                      | Phosphate buffer (pH 6.61)              | This work                                                         |
| 7       | Carbon Cloth | 1                   | 334                | -10                                     | 1.0 M aqueous KOH solution (pH = 13.8)  | This work                                                         |
| 8       | Carbon Cloth | 2                   | 409                | -10                                     | 0.5 M $\text{H}_2\text{SO}_4$ (pH 0.13) | This work                                                         |
| 9       | Carbon Cloth | 2                   | 295                | -1                                      | Phosphate buffer (pH 6.61)              | This work                                                         |
| 10      | Carbon Cloth | 2                   | 260                | -10                                     | 1.0 M aqueous KOH solution (pH = 13.8)  | This work                                                         |

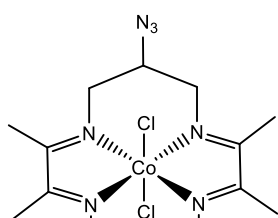

Co-a

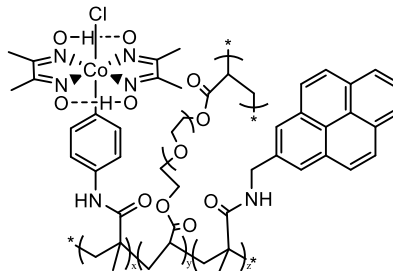

Co-c

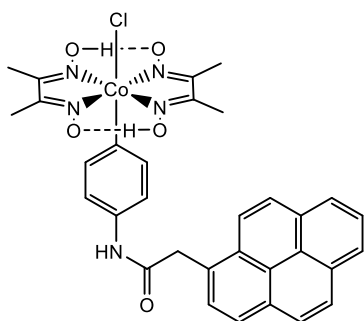

Co-b

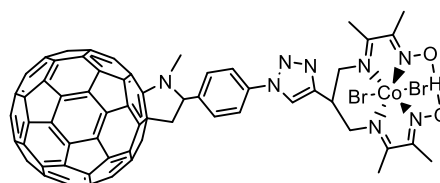

Co-d



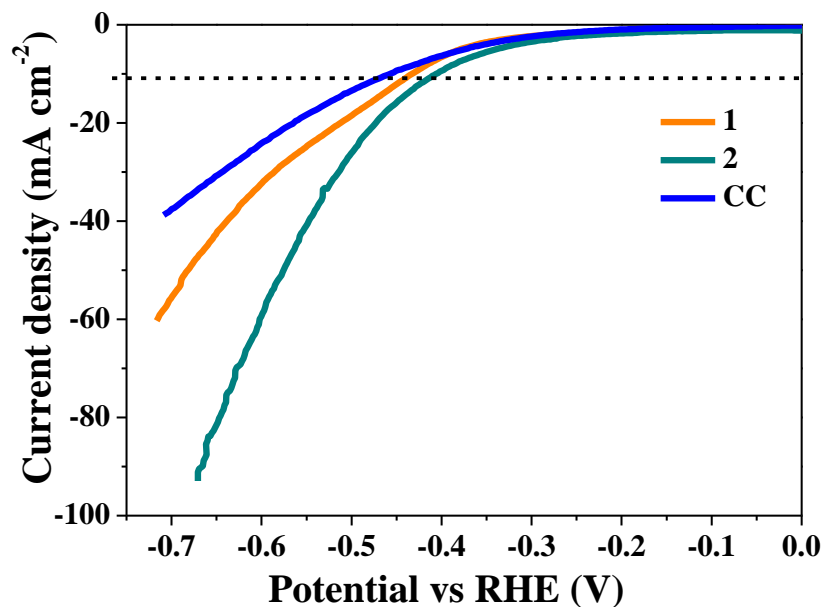

**Figure S13.** The linear sweep voltammetry (LSV) profile for the hydrogen evolution reaction (HER) of complex **1** and **2** compared with bare carbon cloth in 0.5 M H<sub>2</sub>SO<sub>4</sub> (pH = 0.13, scan rate: 2 mV s<sup>-1</sup>).

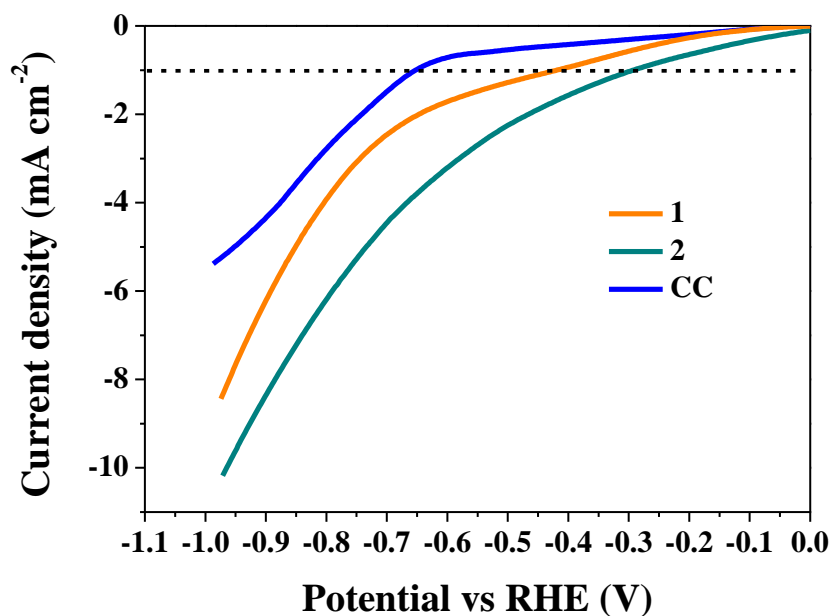

**Figure S14.** LSV profiles for the hydrogen evolution reaction of complex **1** and **2** compared with bare carbon cloth in phosphate buffer (pH = 6.61, scan rate: 2 mV s<sup>-1</sup>).

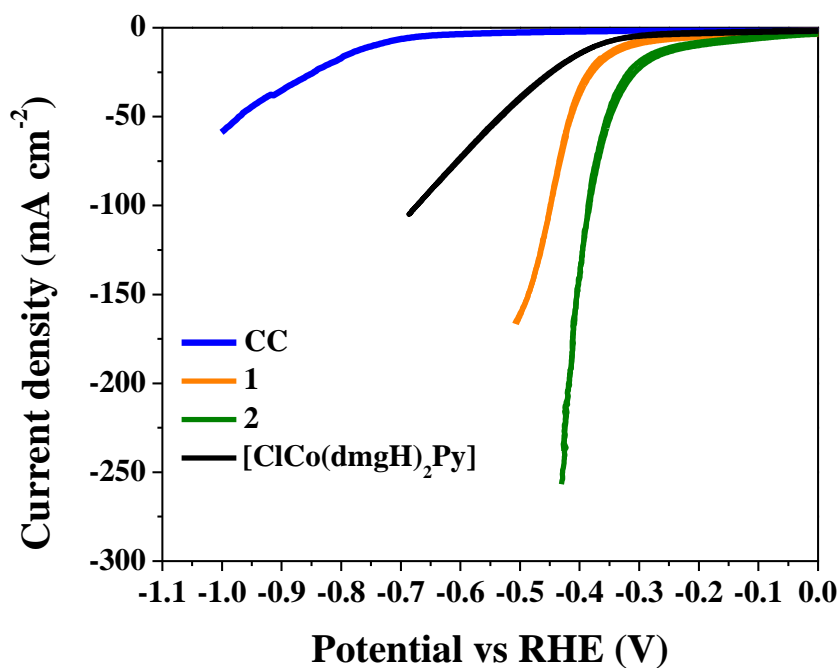

**Figure S15.** CV profile for the hydrogen evolution reaction of complexes **1** and **2** and [ClCo(dmgh)<sub>2</sub>Py] compared with bare CC showing the enhanced HER activity for complex **1** and **2** as compared to [ClCo(dmgh)<sub>2</sub>Py] in 1.0 M aqueous KOH solution (pH = 13.8, scan rate: 2 mV s<sup>-1</sup>).

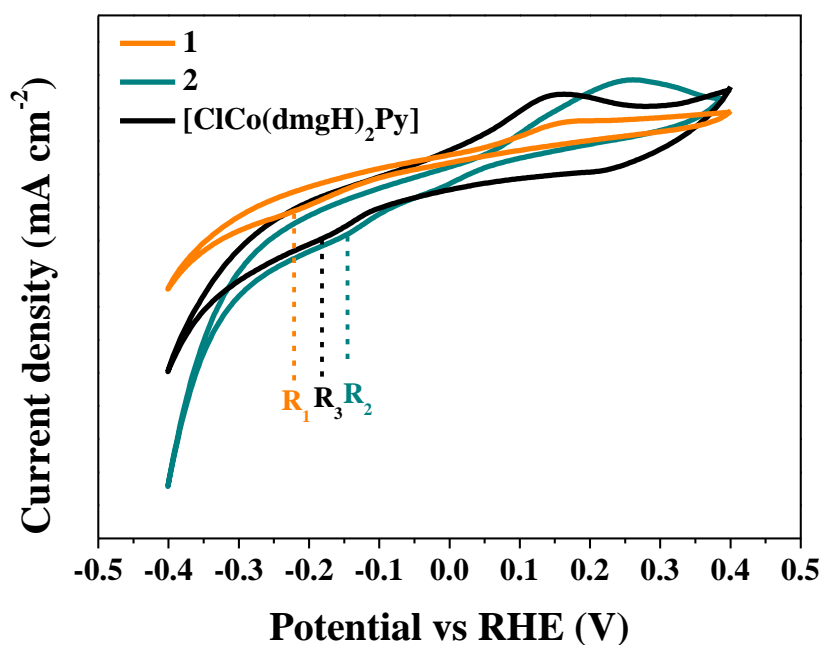

**Figure S16.** CV profiles of the complexes **1** and **2** and [ClCo(dmgh)<sub>2</sub>Py] showing the redox peaks for the reduction of Co(II) to Co(I).electrolyte (pH = 13.8, scan rate: 2 mV s<sup>-1</sup>).

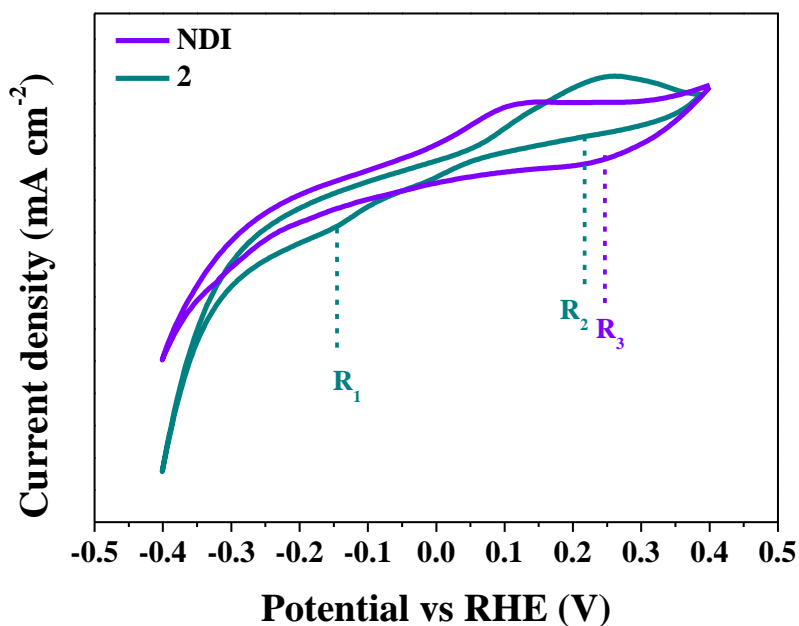

**Figure S17.** CV profiles of the complex **2** and ligand **NDI** (1.0 KOH, pH = 13.8, scan rate: 2 mV s<sup>-1</sup>). The complex **2** showed the two reduction peaks for Co(II) to Co(I) (R<sub>1</sub>) and NDI (R<sub>2</sub>) while only one redox peak (R<sub>3</sub>) was detected in **NDI**.

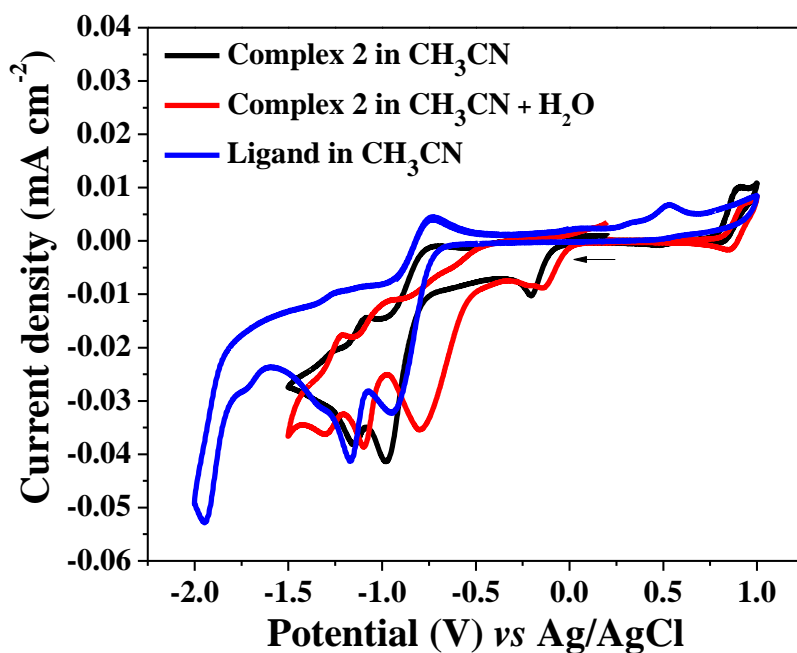

**Figure S18.** CV profiles of the complex **2** in acetonitrile and acetonitrile-water solution compared with CV of NDI ligand in acetonitrile (scan rate: 50 mV s<sup>-1</sup> and supporting electrolyte is [NBu<sub>4</sub>][PF<sub>6</sub>], glassy carbon working electrode).

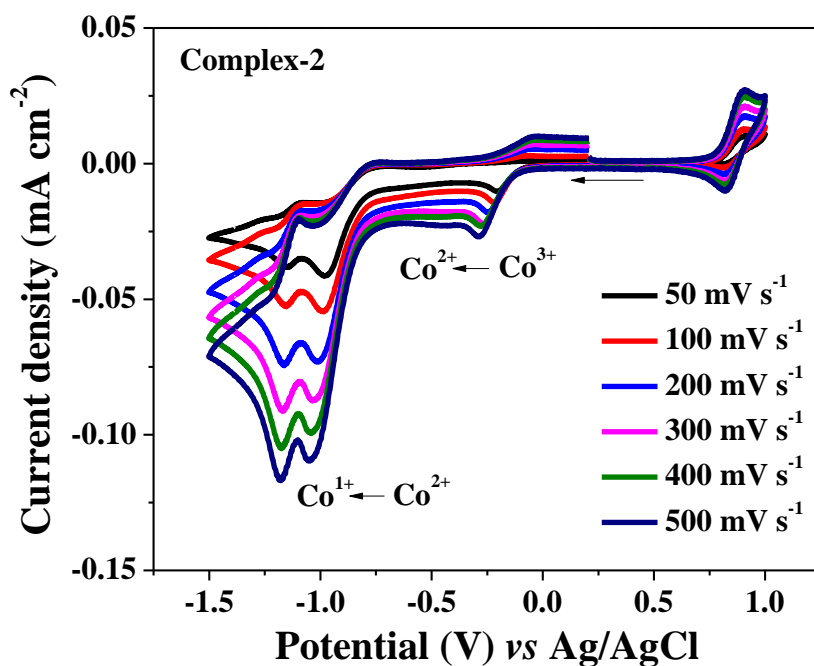

**Figure S19.** Scan rate dependent CV profiles of the complex **2** in acetonitrile solution. (Supporting electrolyte is  $[\text{NBu}_4][\text{PF}_6]$ , glassy carbon working electrode).

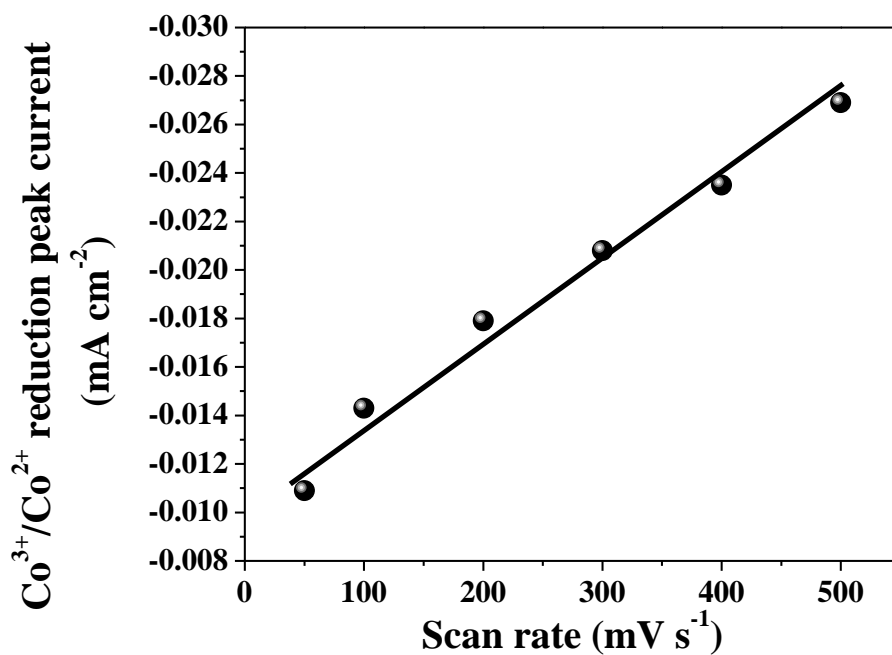

**Figure S20.**  $\text{Co}^{3+}/\text{Co}^{2+}$  reduction peak current of complex **2** plotted against varying scan rates.

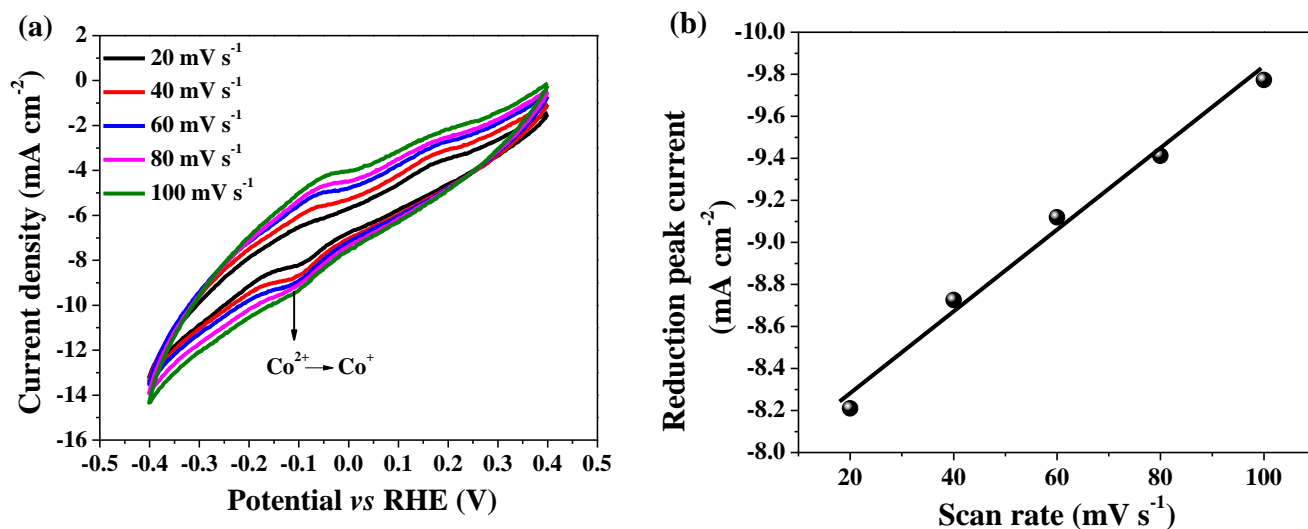

**Figure S21.** (a) Scan rate dependent CV profiles of complex **2** immobilized on carbon cloth in 1.0 M KOH solution and (b) plot of the reduction peak current density with varying scan rates.

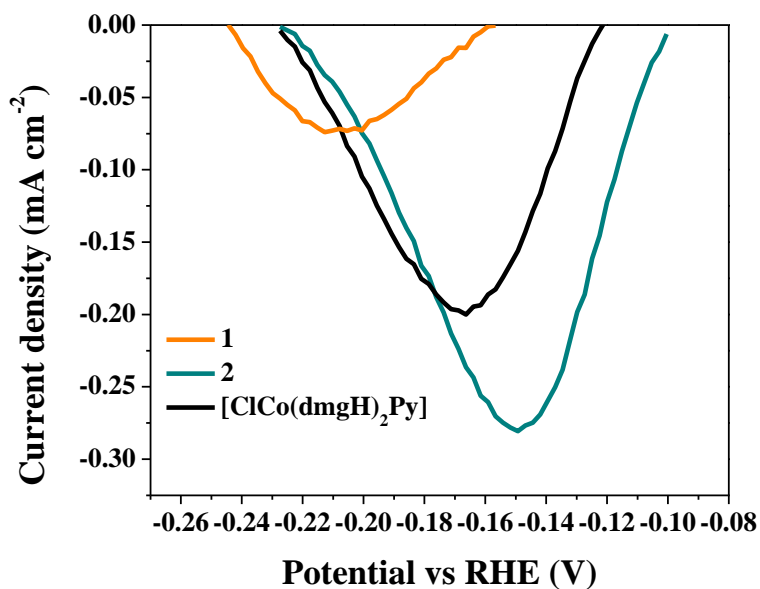

**Figure S22.** Reduction peak area ( $R_1$ ,  $R_2$ ,  $R_3$ ) of the complexes **1** and **2** and [ClCo(dmgh)<sub>2</sub>Py], respectively utilized for the calculation of electroactive species by the integration of reduction peak.

## Equation S2. Determination of surface concentration of electroactive species

We have determined the surface concentration of the electroactive species in mol/cm<sup>2</sup> using the Sharp equation.<sup>1-2</sup> The peak current under CV is related to the surface concentration of electroactive species ( $\Gamma$ ) by the following equation:<sup>1-2</sup>

$$I_p = n^2 F^2 A \Gamma v / 4RT$$

$$\Gamma = I_p 4RT / n^2 F^2 A v$$

where  $n$  represents the number of electrons involved in the reaction,  $A$  is the geometric surface area of the electrode,  $\Gamma$  is the surface concentration of the electroactive species (mol cm<sup>-2</sup>),  $v$  is the scan rate (V s<sup>-1</sup>),  $R$  denote the gas constant (8.314 J mol<sup>-1</sup> K<sup>-1</sup>),  $F$  represents the Faraday constant (96 485 C mol<sup>-1</sup>) and  $T$  express the temperature (298 K).<sup>1-2</sup>

For complex **2**

$$\Gamma = 0.279 \times 4 \times 8.314 \times 298 / 2^2 \times 96485 \times 1 \times 0.005$$

$$\Gamma = 1.48 \times 10^{-5} \text{ mol cm}^{-2}$$

For complex **1**

$$\Gamma = 0.199 \times 4 \times 8.314 \times 298 / 2^2 \times 96485 \times 1 \times 0.005$$

$$\Gamma = 1.05 \times 10^{-5} \text{ mol cm}^{-2}$$

For complex [ClCo(dmgh)<sub>2</sub>Py]

$$\Gamma = 0.072 \times 4 \times 8.314 \times 298 / 2^2 \times 96485 \times 1 \times 0.005$$

$$\Gamma = 0.38 \times 10^{-5} \text{ mol cm}^{-2}$$

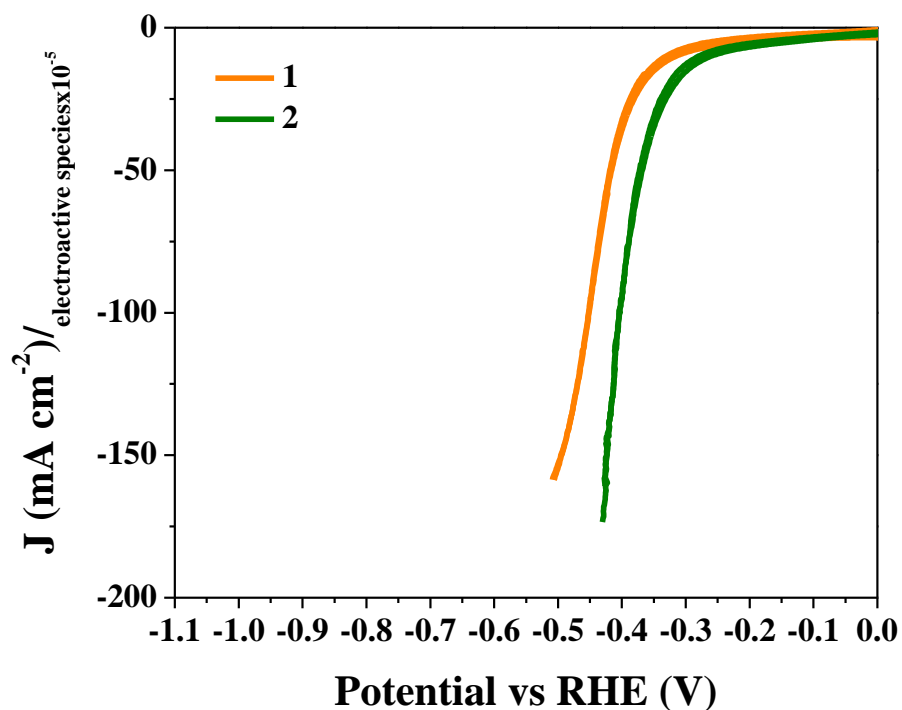

**Figure S23.** The HER activity of the complexes 1 and 2 normalized with the surface concentration of electroactive sites.

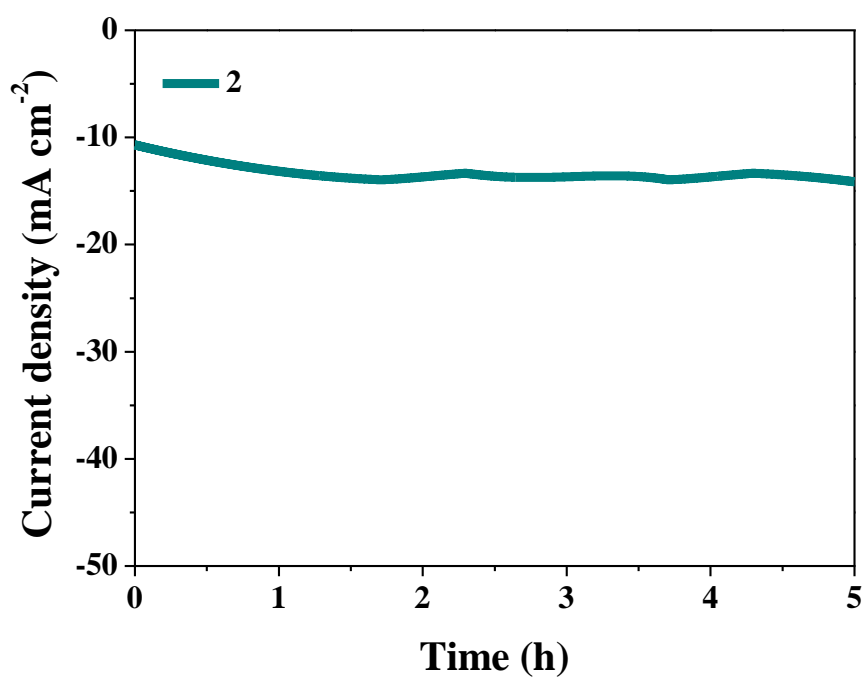

**Figure S24.** Chronoamperometric measurement for the hydrogen evolution reaction of complex 2 at 280 mV overpotential showing the stability of complex 2 for 5 h.

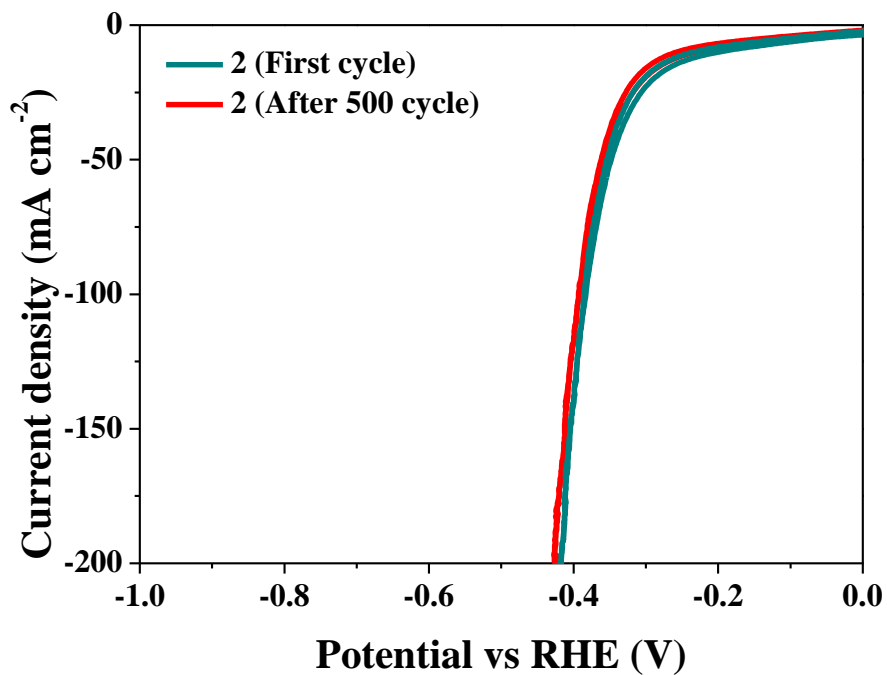

**Figure S25:** CV profile for the hydrogen evolution reaction of complex **2** for first cycle and after 500 CV cycles showing no change in the overpotential as well as in current density after 500 CV cycles.



## Determination of the faradaic efficiency of complex 2

The water displacement method has been utilized to determine the amount of hydrogen produced during the hydrogen evolution reaction. The amount of H<sub>2</sub> was detected during the chronoamperometric measurement for 3600 s at 10 mA cm<sup>-2</sup> current density.<sup>3-5</sup> Firstly, the theoretical calculated amount of hydrogen was calculated using the following equation from Faraday's law.<sup>3-5</sup>

$$n\text{H}_2(\text{theoretical}) = \frac{Q}{n \times F} = \frac{I \times t}{n \times F} = \frac{0.02 \text{ A} \times 3600 \text{ s}}{2 \times 96485.3 \text{ s A mol}^{-1}} = 0.00037 \text{ mmol}$$

Where  $n\text{H}_2$  represents the theoretically calculated amount of H<sub>2</sub>,  $Q$  denotes amount of applied charge,  $n$  shows the number of electrons transferred in HER (2 electrons),  $F$  denotes the Faraday constant (96485.3 s A mol<sup>-1</sup>),  $I$  represents the applied current (0.01 A), and  $t$  is the reaction time (3600 s).<sup>3-5</sup>

At the time of chronoamperometric measurements, the amount of hydrogen generated during the experiment was measured and the theoretically calculated amount was compared with the actually generated amount of H<sub>2</sub>. Further, the faradaic efficiency was calculated using the following equation:<sup>3-5</sup>

$$\text{Faradaic efficiency (\%)} = \frac{n\text{H}_2(\text{experimental})}{n\text{H}_2(\text{Theoretical})} \times 100 = \frac{0.000365 \text{ mmol}}{0.00037 \text{ mmol}} \times 100 = 98.6\%$$

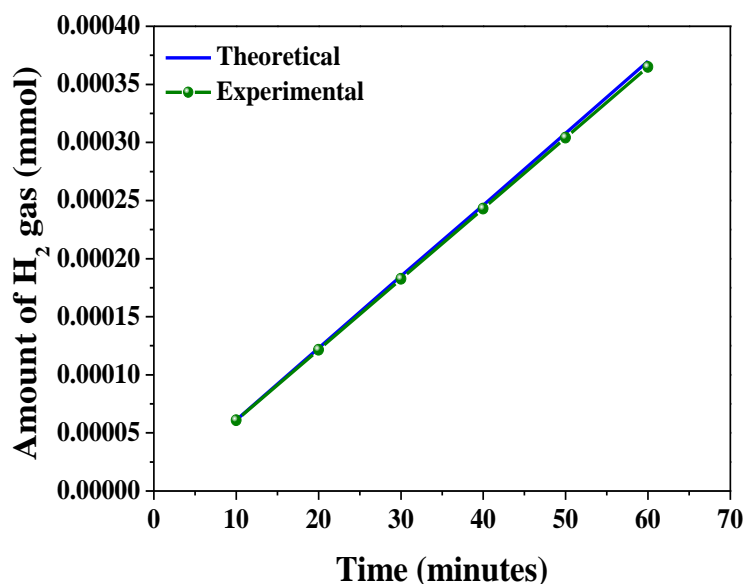

**Figure S26.** Plot for the amount of theoretically calculated hydrogen (blue line) and experimentally measured hydrogen (green line) versus time for complex 2.

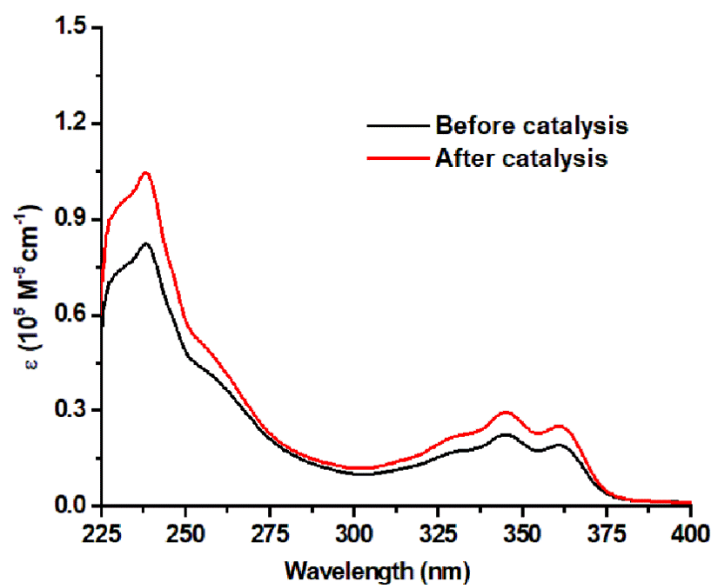

**Figure S27.** UV-Vis spectra of complex **2** (After and before the catalysis) in  $\text{CH}_2\text{Cl}_2$  solution at  $10^{-5}$  molar concentration.

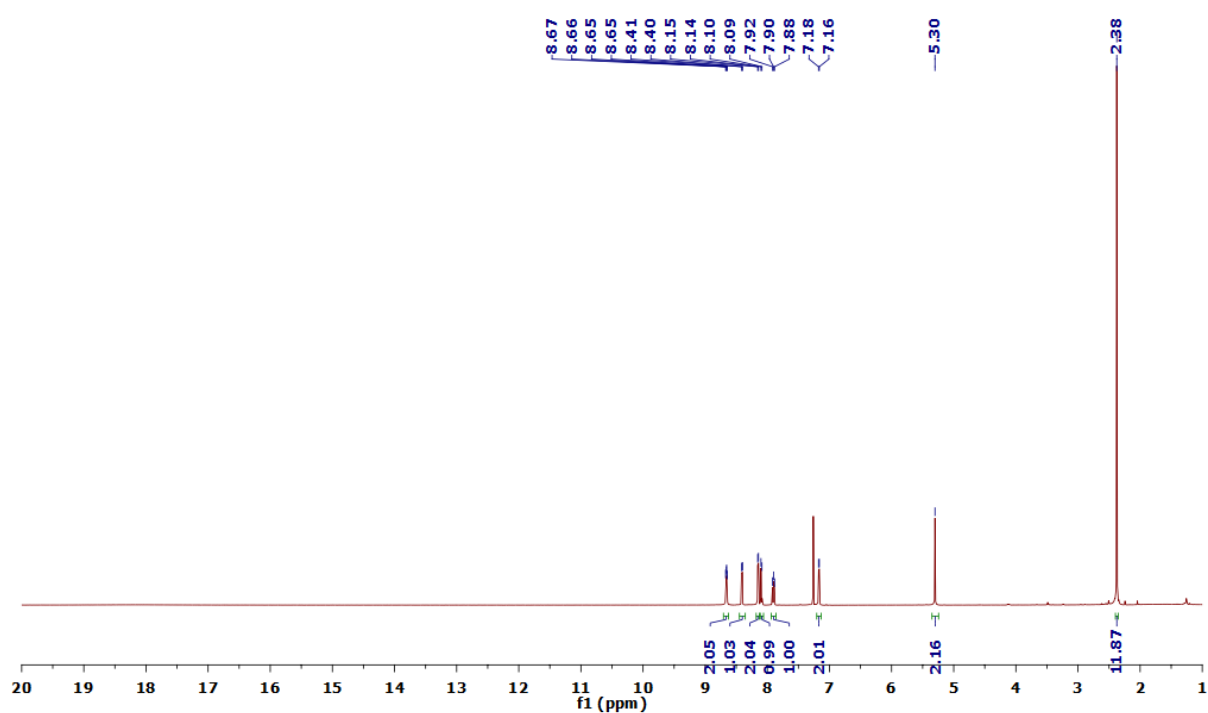

**Figure S28:**  $^1\text{H}$  NMR spectrum (500 MHz,  $\text{CDCl}_3$ ) of complex **2** after electrochemical hydrogen evolution in 1.0 M aqueous KOH solution.

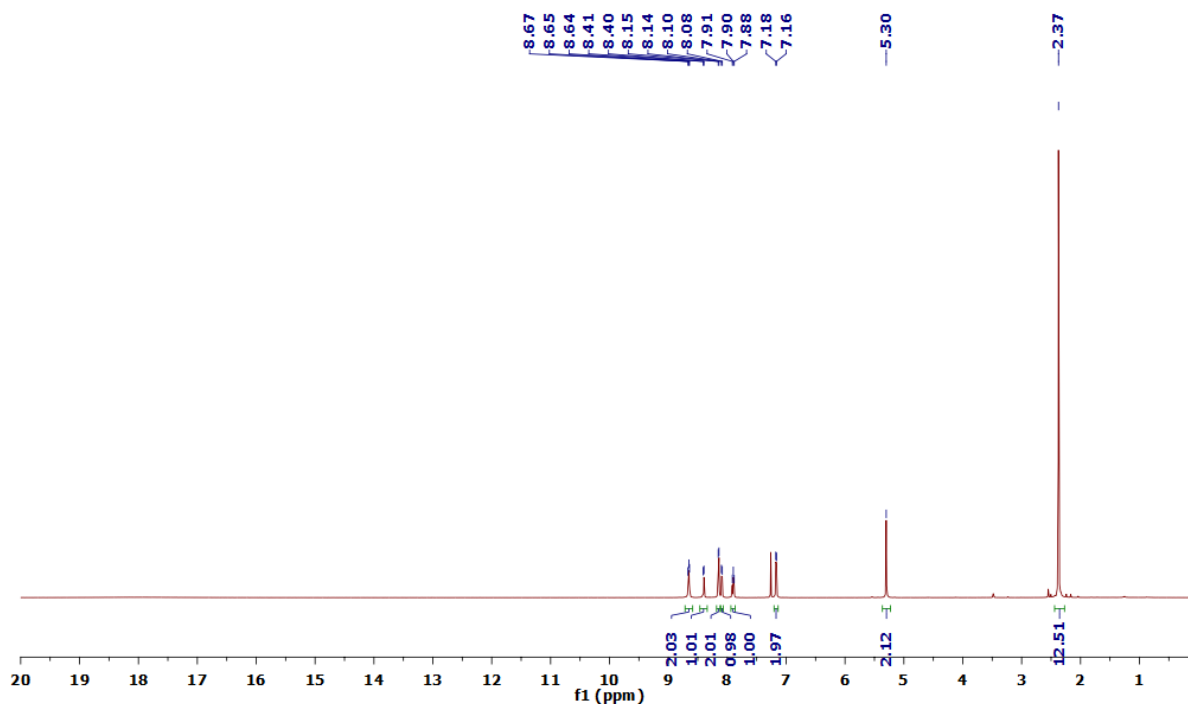

**Figure S29:**  $^1\text{H}$  NMR spectrum (500 MHz,  $\text{CDCl}_3$ ) of complex **2** after dipping in 1.0 M aqueous KOH solution for 2 h.

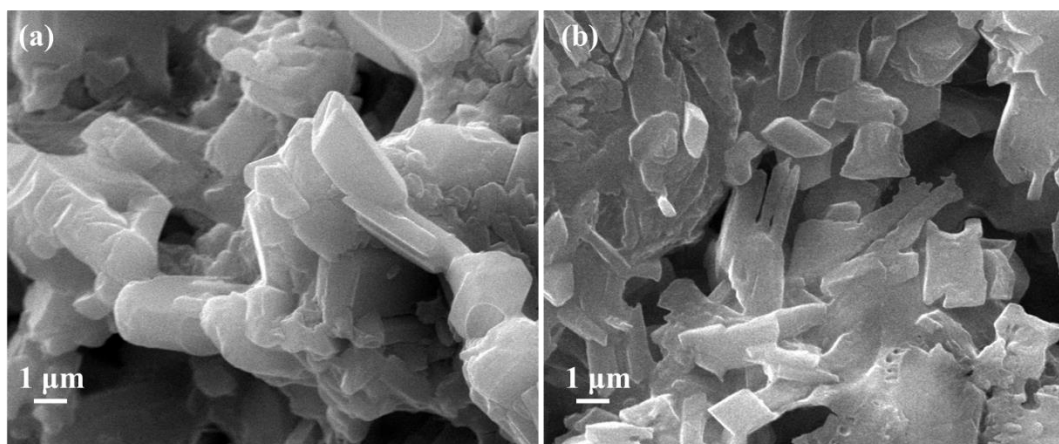

**Figure S30:** (a) SEM image of complex **2** before HER catalysis (fresh) and (b) SEM image of complex **2** after 5 h chronoamperometric HER showing no change in the morphology after catalysis.

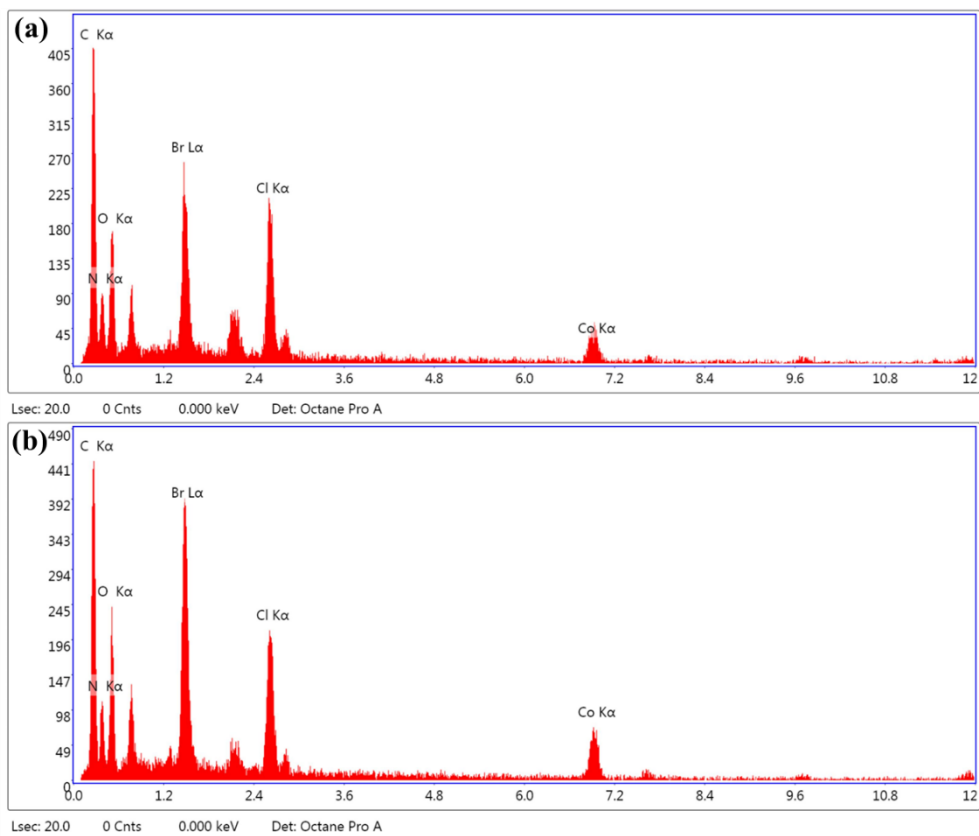

**Figure S31:** (a) EDX spectra of complex **2** before HER catalysis (fresh) and (b) EDX spectra of complex **2** after 5 h chronoamperometric HER.

## References

1. M. Tohidinia, A. Biabangarda and M. Noroozifar, *RSV Adv.*, 2020, **10**, 2944–2951.
2. A. L. Eckermann, D. J. Feld, J. A. Shaw and T. J. Meade, *Coord. Chem. Rev.*, 2010, **254**, 1769–1802
3. J. Jia, L. C. Seitz, J. D. Benck, Y. Huo, Y. Chen, J. W. D. Ng, T. Bilir, J. S. Harris and T. F. Jaramillo, *Nat. Commun.*, 2016, **7**, 13237.
4. A. Paracchino, V. Laporte, K. Sivula, M. Grätzel and E. Thimsen, *Nat. Mater.*, 2011, **10**, 456-461.
5. I. M. Mosa, S. Biswas, A. M. El-Sawy, V. Botu, C. Guild, W. Song, R. Ramprasad, J. F. Ruslingace and S. L. Suib, *J. Mater. Chem. A*, 2016, **4**, 620-631.
